# Supplementary material for: Hierarchically assembled 1-dimensional hetero-nanostructures: single crystalline RuO2 nanowires on electrospun IrO2 nanofibres
Source: Royal Society of Chemistry journal article supplement (doi:10.1039/c3ce26846b), 2013-01-01

## Supporting Information:

### **Hierarchically assembled 1-dimensional hetero- nanostructures: single crystalline RuO<sub>2</sub> nanowires on electrospun IrO<sub>2</sub> nanofibres**

Jaeyeon Lee<sup>a</sup>, Hee-Sung Yang<sup>b</sup>, Nam-Suk Lee<sup>c</sup>, Osung Kwon<sup>d</sup>, Hae-Young Shin<sup>e</sup>,  
Seokhyun Yoon<sup>e</sup>, Jeong Min Baik<sup>f</sup>, Young-Soo Seo<sup>b\*</sup> and Myung Hwa Kim<sup>a\*</sup>

<sup>a</sup>*Department of Chemistry & Nano Science, Ewha Womans University, Seoul, 120-750, Korea*

<sup>b</sup>*Department of Nano Science & Technology, Sejong University, 134-747, Seoul, Korea*

<sup>c</sup>*National Center for Nanomaterials Technology (NCNT), Pohang University of Science and Technology (POSTECH), Pohang, 790-784, Korea*

<sup>d</sup>*Division of Robotics System, Daegu Gyeongbuk Institute of Science & Technology (DGIST), Dalseong, 711-873, Korea.*

<sup>e</sup>*Department of Physics, Ewha Womans University, Seoul, 120-750, Korea*

<sup>f</sup>*School of Mechanical and Advanced Materials Engineering, Ulsan National Institute of Science and Technology (UNIST), Ulsan, 698-805, Korea*

*\*To whom all correspondence should be addressed: [myungkim@ewha.ac.kr](mailto:myungkim@ewha.ac.kr),  
[ysseo@sejong.ac.kr](mailto:ysseo@sejong.ac.kr)*

**Fig. S1** Additional SEM images of RuO<sub>2</sub> nanowires grown on electrospun IrO<sub>2</sub> nanofibres.

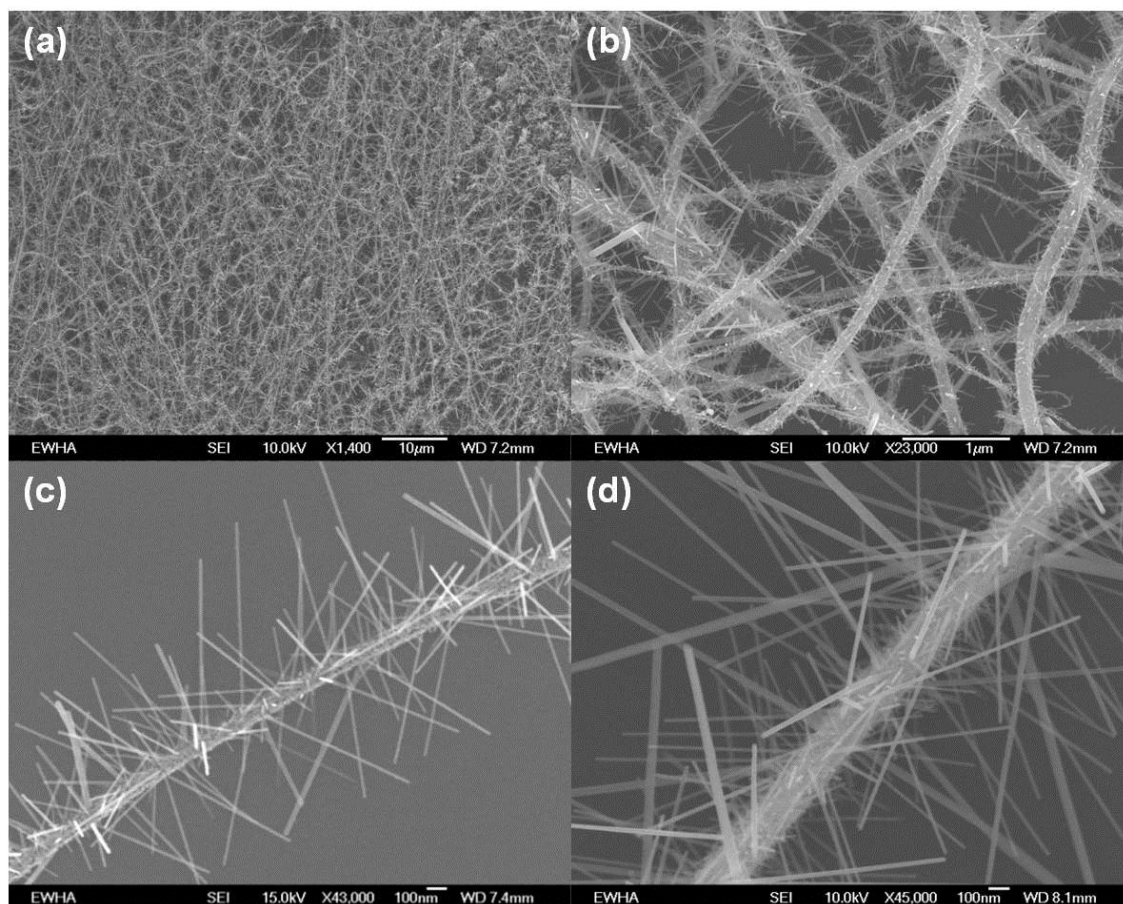

**Fig. S2** Additional low and high magnification TEM images of a representative RuO<sub>2</sub> nanowire grown on electrospun fibre and the fast Fourier transform (FFT) of the lattice-resolved image.

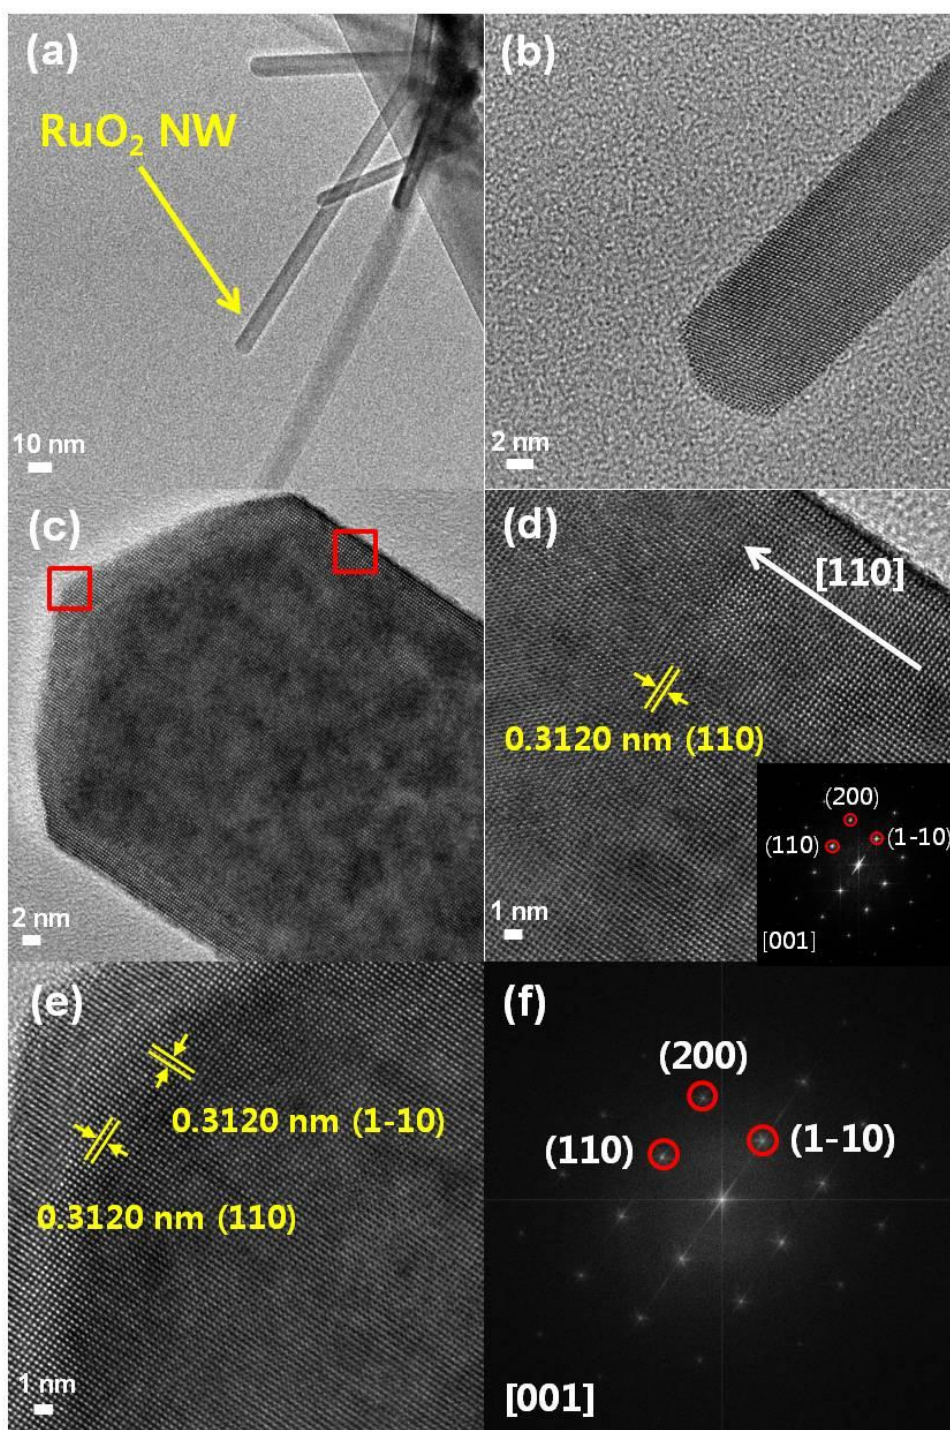

**Fig. S3** (a) High angle angular dark field (HAADF) STEM image and (b)-(e) EDS-elemental mapping analysis for Ru(L), Ir(M) and O(K) atoms of RuO<sub>2</sub> nanowires on electrospun IrO<sub>2</sub> nanofibres.

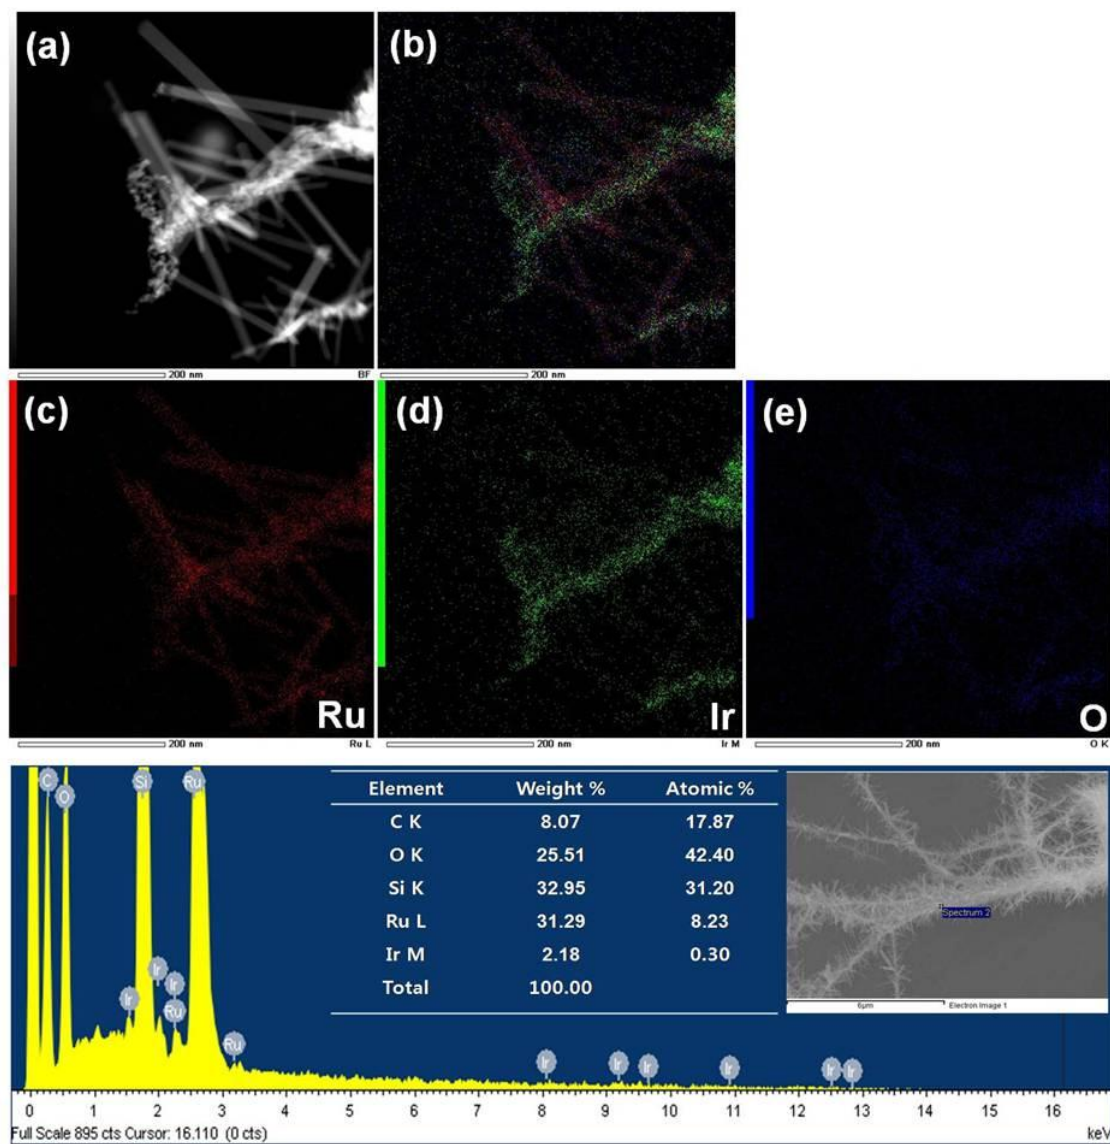

Supplement: c3ce26846b.pdf [file c3ce26846b.pdf]
